# Supplementary material
Source: Springer Nature journal article supplement (https://www.springermedizin.de/resource/supplementary/12879_2010_1075_MOESM4_ESM.pdf/9442522)

A

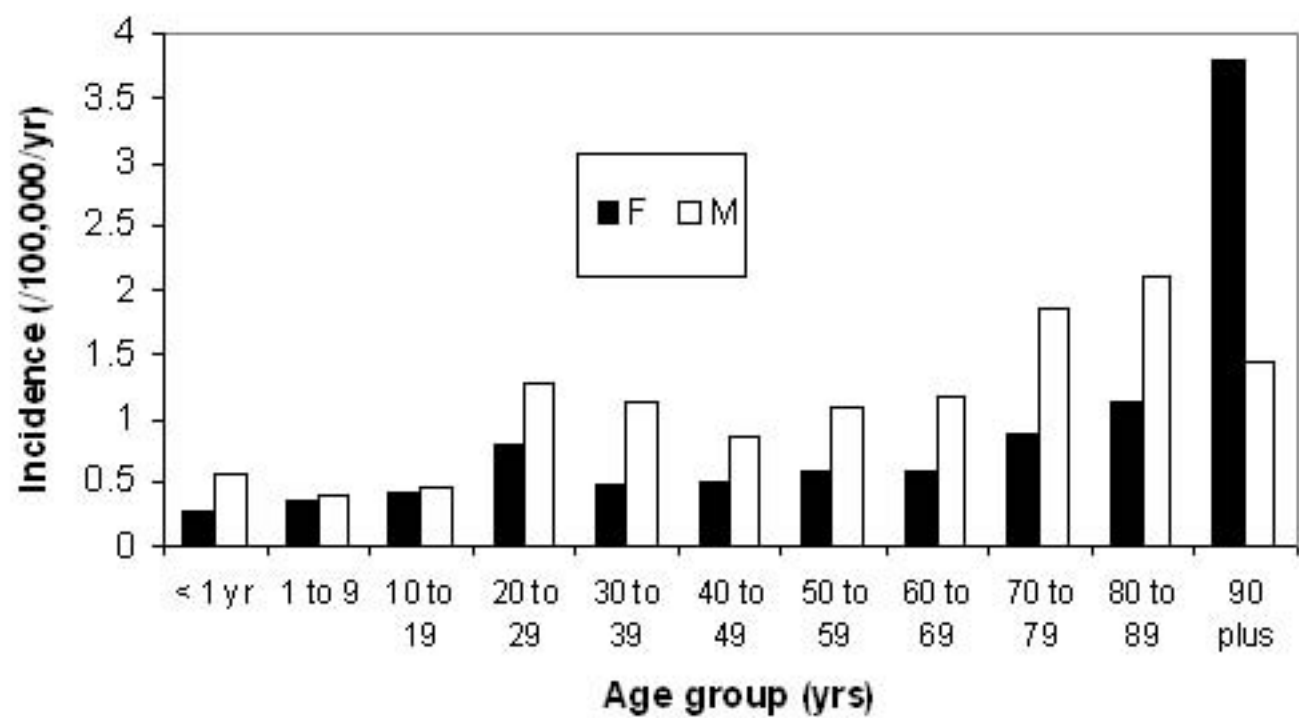

B

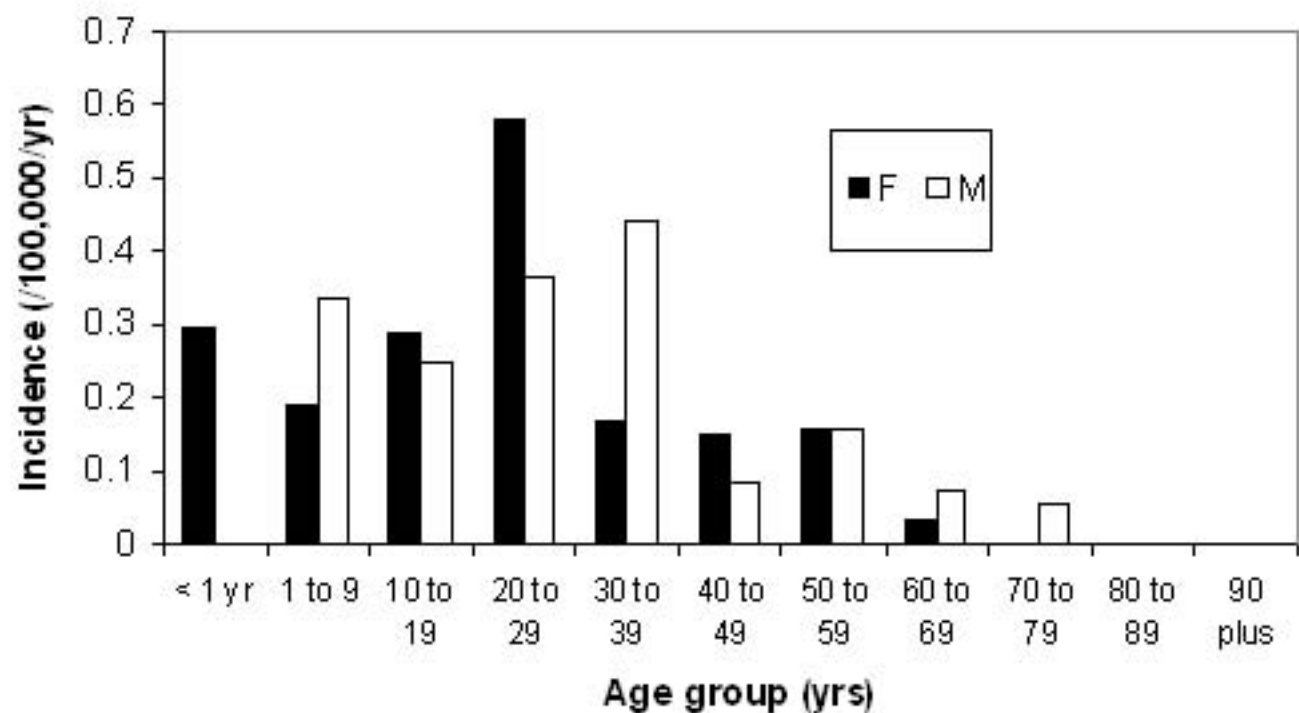

Supplement: MOESM4 [file 9442522]
